# Supplementary material for: Fractionation of rare-earth metallofullerenes via reversible uptake and release from reactive silica
Source: Royal Society of Chemistry journal article supplement (doi:10.1039/c3dt53381f), 2014-01-01
Supplement: c3dt53381f1.pdf [file c3dt53381f1.pdf]

### Fractionation of Rare-Earth Metallofullerenes via Reversible Uptake and Release from Reactive Silica

Steven Stevenson,\* Khristina A. Rottinger, and Jessica S. Field

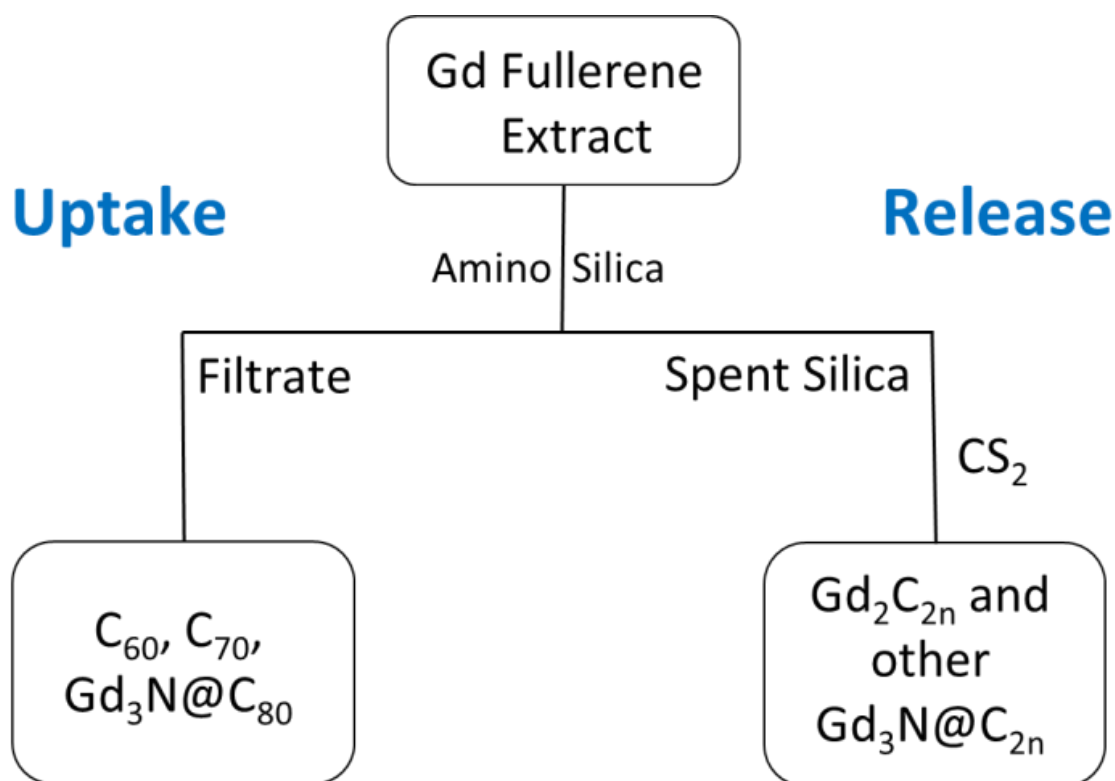

Figure SI-1. Overview of the separation strategy for isolating a sample containing Gd<sub>3</sub>N@C<sub>80</sub> as the only metallofullerene present in a mixture with C<sub>60</sub> and C<sub>70</sub> (filtrate). The method for enriched fractions of Gd<sub>2</sub>C<sub>2n</sub> and Gd<sub>3</sub>N@C<sub>2n</sub> higher metallofullerenes uses CS<sub>2</sub> release chemistry.
